# Supplementary material
Source: publisher figshare collection journal article supplement (https://frontiersin.figshare.com/ndownloader/files/12418931)
Supplement: Supplementary file 1 [file 12418931]

Appendix: Stimuli (test version 1)

| Condition | Item | Chosen Item | | |
| --- | --- | --- | --- | --- |
|  | Pig - Barn | 1 | 2 | 3 |
| A | *Donne-moi le cochon qui est à côté de la ferme*  Give me the pig that is beside the barn |  |  |  |
| B | *Donne-moi les cochons qui sont à côté de la ferme*  Give me the pige that are beside the barn |  |  |  |
| C | *Donne-moi un cochon qui est à côté de la ferme*  Give me a pig that is beside the barn |  |  |  |
| D | *Donne-moi des cochons qui sont à côté de la ferme*  Give me some pigs that are beside the barn |  |  |  |
| E | *Donne-moi tous les cochons qui sont à côté de la ferme*  Give me all the pigs that are beside the barn |  |  |  |
|  | Cow - House | | | |
| A | *Donne-moi la vache qui est à côté de la maison*  Give me the cow that is beside the house |  |  |  |
| B | *Donne-moi les vaches qui sont à côté de la maison*  Give me the cows that are beside the house |  |  |  |
| C | *Donne-moi une vache qui est à côté de la maison*  Give me a cow that is beside the house |  |  |  |
| D | *Donne-moi des vaches qui sont à côté de la maison*  Give me some cows that are beside the house |  |  |  |
| E | *Donne-moi toutes les vaches qui sont à côté de la maison*  Give me all the cows that are beside the house |  |  |  |
|  | Horse - Barn | | | |
| A | *Donne-moi le cheval qui est à côté de la ferme*  Give me the horse that is beside the barn |  |  |  |
| B | *Donne-moi les chevaux qui sont à côté de la ferme*  Give me the horses that are beside the barn |  |  |  |
| C | *Donne-moi un cheval qui est à côté de la ferme*  Give me a horse that is beside the barn |  |  |  |
| D | *Donne-moi des chevaux qui sont à côté de la ferme*  Give me some horses that are beside the barn |  |  |  |
| E | *Donne-moi tous les chevaux qui sont à côté de la ferme*  Give me all the horses that are beside the barn |  |  |  |
|  | Goat - House | | | |
| A | *Donne-moi la chèvre qui est à côté de la maison*  Give me the goat that is beside the house |  |  |  |
| B | *Donne-moi les chèvres qui sont à côté de la maison*  Give me the goats that are beside the house |  |  |  |
| C | *Donne-moi une chèvre qui est à côté de la maison*  Give me a goat that is beside the house |  |  |  |
| D | *Donne-moi des chèvres qui sont à côté de la maison*  Give me some goats that are beside the house |  |  |  |
| E | *Donne-moi toutes les chèvres qui sont à côté de la maison*  Give me all the goats that are beside the house |  |  |  |

Note : Dark shaded areas indicate maximal responses for definite conditions, light shaded areas indicate possible responses for indefinite conditions
